# Supplementary material for: Relationship between hypomagnesaemia and ICU mortality in patients with severe intracerebral hemorrhage
Source: Research Square preprint supplement (doi:10.21203/rs.3.rs-3557151/v1), 2023-11-14
Supplement: Supplementary file 1 [file 96451ae0ee4db726e80f5bea.docx]

Supplementary Material:

**Relationship between hypomagnesaemia and ICU mortality in patients with severe intracerebral hemorrhage**

**Authors:** Xinzhao Jiang MD1†, Faliang Gao PhD2†, Zongjie Shi MD1, Fang Liu MD1, Wenyan Zhao MD3*, Qihong Sun MD4*

**Table S1. Characteristics of study participants**

| Characteristics | Hypomagnesemia | | | *P*-value |
| --- | --- | --- | --- | --- |
| Total | Without | With |
| N | 2026 | 1537 | 489 |  |
| **Age, years** | 61.8 ± 17.3 | 62.5 ± 16.9 | 59.3 ± 18.3 | <0.001 |
| **Gender, N (%)** |  |  |  | 0.093 |
| Female | 906 (44.8) | 671 (43.7) | 235 (48.1) |  |
| Male | 1118 (55.2) | 864 (56.3) | 254 (51.9) |  |
| **Race/ethnicity, N (%)** |  |  |  | 0.756 |
| Caucasian | 1509 (74.5) | 1140 (74.2) | 369 (75.5) |  |
| African American | 222 (11.0) | 175 (11.4) | 47 (9.6) |  |
| Hispanic | 106 (5.2) | 79 (5.1) | 27 (5.5) |  |
| Asian | 46 (2.3) | 37 (2.4) | 9 (1.8) |  |
| Native American | 8 (0.4) | 5 (0.3) | 3 (0.6) |  |
| Other/Unknown | 135 (6.7) | 101 (6.6) | 34 (7.0) |  |
| **SOFA score** |  |  |  | <0.001 |
| > 6 | 671 (33.1) | 464 (30.2) | 207 (42.3) |  |
| ≤ 6 | 1355 (66.9) | 1073 (69.8) | 282 (57.7) |  |
| **Comorbidities, N (%)** |  |  |  |  |
| Hypertension | 1055 (52.1) | 836 (54.4) | 219 (44.8) | <0.001 |
| Coronary artery disease | 162 (8.0) | 123 (8.0) | 39 (8.0) | 0.985 |
| Congestive heart failure | 133 (6.6) | 101 (6.6) | 32 (6.5) | 0.983 |
| Diabetes | 390 (19.2) | 290 (18.9) | 100 (20.4) | 0.440 |
| Chronic pulmonary disease | 122 (6.0) | 98 (6.4) | 24 (4.9) | 0.235 |
| Stroke | 250 (12.3) | 198 (12.9) | 52 (10.6) | 0.188 |
| Malignant cancer | 146 (7.2) | 117 (7.6) | 29 (5.9) | 0.210 |
| Renal disease | 110 (5.4) | 94 (6.1) | 16 (3.3) | 0.016 |
| **Physical examination** |  |  |  |  |
| SBP, mmHg | 130.3 ± 15.8 | 131.2 ± 15.5 | 127.1 ± 16.4 | <0.001 |
| DBP, mmHg | 69.1 ± 10.9 | 69.3 ± 10.9 | 68.3 ± 10.8 | 0.054 |
| BMI, kg/m2 | 27.9 ± 6.7 | 28.1 ± 6.8 | 27.4 ± 6.4 | 0.050 |
| **Laboratory data** |  |  |  |  |
| WBC count, ×103/µl | 11.9 ± 9.7 | 11.9 ± 10.8 | 11.9 ± 5.3 | 0.882 |
| HB, g/mL | 12.5 ± 2.1 | 12.7 ± 2.1 | 11.9 ± 2.1 | <0.001 |
| PLT, ×103/µl | 211.4 ± 79.3 | 214.9 ± 75.3 | 200.6 ± 89.7 | <0.001 |
| Calcium, mg/dL | 8.6 ± 0.7 | 8.7 ± 0.6 | 8.3 ± 0.8 | <0.001 |
| Creatinine, mg/dL | 1.1 ± 1.1 | 1.2 ± 1.2 | 1.0 ± 0.7 | 0.003 |

Note: Continuous variables were presented as mean ± SD, calculated by linear regression model. Categorical variables were presented as numbers (%), calculated by chi-square test.

Abbreviations: SD, standard deviation; BMI, body mass index; SOFA, sequential organ failure assessment; SBP, systolic blood pressure; DBP, diastolic blood pressure; WBC, white blood cell; HB, hemoglobin; PLT, platelet.
